# Supplementary material
Source: Springer Nature journal article supplement (https://www.springermedizin.de/resource/supplementary/12985_2011_1544_MOESM4_ESM.pdf/9610044)
Supplement: MOESM4 [file 9610044]

Domain 1:  
Transcription  
activator

Domain 2:  
Site-specific  
DNA binding

Domain 3:  
Protein/Protein  
Interactions (ZANK)

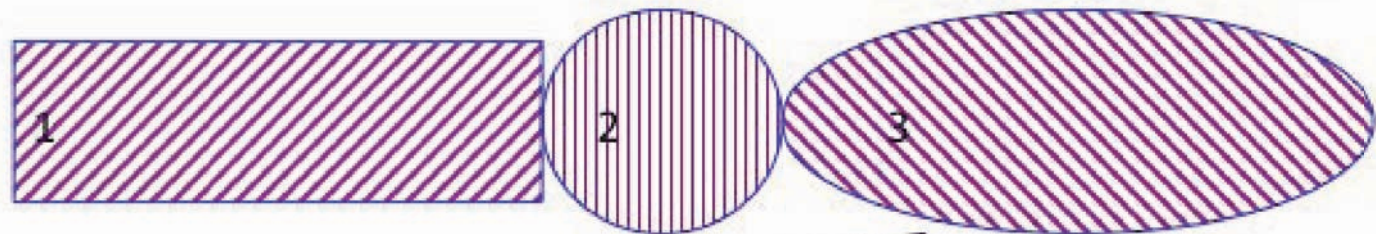

P53 tumor suppressor

NF- $\kappa$ B p65  
(RelA)

ZEBRA  
(homodimer)
